# Supplementary material for: SUMOFLUX: A Generalized Method for Targeted 13C Metabolic Flux Ratio Analysis
Source: PLoS Comput Biol. 2016 Sep 14;12(9):e1005109. doi: 10.1371/journal.pcbi.1005109 (PMC5023139; doi:10.1371/journal.pcbi.1005109)
Supplement: S8 Table — (XLSX) [file pcbi.1005109.s015.xlsx]

## Sheet: Sheet1
S8 Table. Metabolites and metabolite fractions MRM transitions measurable with LC-MS/MS methods
Metabolite	Abbreviation	Simulated MRM transition
Oxoglutarate	OGA15	OGA15_0>OGA15_0
		OGA15_1>OGA15_1
		OGA15_2>OGA15_2
		OGA15_3>OGA15_3
		OGA15_4>OGA15_4
		OGA15_5>OGA15_5
Oxoglutarate	OGA25	OGA15_0>OGA25_0
		OGA15_1>OGA25_0
		OGA15_1>OGA25_1
		OGA15_2>OGA25_1
		OGA15_2>OGA25_2
		OGA15_3>OGA25_2
		OGA15_3>OGA25_3
		OGA15_4>OGA25_3
		OGA15_4>OGA25_4
		OGA15_5>OGA25_4
Oxoglutarate	OGA24	OGA15_0>OGA24_0
		OGA15_1>OGA24_0
		OGA15_1>OGA24_1
		OGA15_2>OGA24_0
		OGA15_2>OGA24_1
		OGA15_2>OGA24_2
		OGA15_3>OGA24_1
		OGA15_3>OGA24_2
		OGA15_3>OGA24_3
		OGA15_4>OGA24_2
		OGA15_4>OGA24_3
		OGA15_5>OGA24_3
Phosphoenolpyruvate	PEP13	PEP13_0>PEP13_0
		PEP13_1>PEP13_1
		PEP13_2>PEP13_2
		PEP13_3>PEP13_3
Phosphoenolpyruvate	PEP23	PEP13_0>PEP23_0
		PEP13_1>PEP23_0
		PEP13_1>PEP23_1
		PEP13_2>PEP23_1
		PEP13_2>PEP23_2
		PEP13_3>PEP23_2
Biphosphoglycerate	BPG13	BPG13_0>BPG13_0
		BPG13_1>BPG13_1
		BPG13_2>BPG13_2
		BPG13_3>BPG13_3
Pyruvate	PYR13	PYR13_0>PYR13_0
		PYR13_1>PYR13_1
		PYR13_2>PYR13_2
		PYR13_3>PYR13_3
Pyruvate	PYR23	PYR13_0>PYR23_0
		PYR13_1>PYR23_0
		PYR13_1>PYR23_1
		PYR13_2>PYR23_1
		PYR13_2>PYR23_2
		PYR13_3>PYR23_2
Oxaloacetate	OAA14	OAA14_0>OAA14_0
		OAA14_1>OAA14_1
		OAA14_2>OAA14_2
		OAA14_3>OAA14_3
		OAA14_4>OAA14_4
Oxaloacetate	OAA24	OAA14_0>OAA24_0
		OAA14_1>OAA24_0
		OAA14_1>OAA24_1
		OAA14_2>OAA24_1
		OAA14_2>OAA24_2
		OAA14_3>OAA24_2
		OAA14_3>OAA24_3
		OAA14_4>OAA24_3
Ribose-5-phosphate	P5P15	P5P15_0>P5P15_0
		P5P15_1>P5P15_1
		P5P15_2>P5P15_2
		P5P15_3>P5P15_3
		P5P15_4>P5P15_4
		P5P15_5>P5P15_5
Ribose-5-phosphate	P5P35	P5P15_0>P5P35_0
		P5P15_1>P5P35_0
		P5P15_1>P5P35_1
		P5P15_2>P5P35_0
		P5P15_2>P5P35_1
		P5P15_2>P5P35_2
		P5P15_3>P5P35_1
		P5P15_3>P5P35_2
		P5P15_3>P5P35_3
		P5P15_4>P5P35_2
		P5P15_4>P5P35_3
		P5P15_5>P5P35_3
Ribose-5-phosphate	P5P45	P5P15_0>P5P45_0
		P5P15_1>P5P45_0
		P5P15_1>P5P45_1
		P5P15_2>P5P45_0
		P5P15_2>P5P45_1
		P5P15_2>P5P45_2
		P5P15_3>P5P45_0
		P5P15_3>P5P45_1
		P5P15_3>P5P45_2
		P5P15_4>P5P45_1
		P5P15_4>P5P45_2
		P5P15_5>P5P45_2
Citrate	Cit16	Cit16_0>Cit16_0
		Cit16_1>Cit16_1
		Cit16_2>Cit16_2
		Cit16_3>Cit16_3
		Cit16_4>Cit16_4
		Cit16_5>Cit16_5
		Cit16_6>Cit16_6
Citrate	Cit12	Cit16_0>Cit12_0
		Cit16_1>Cit12_0
		Cit16_1>Cit12_1
		Cit16_2>Cit12_0
		Cit16_2>Cit12_1
		Cit16_2>Cit12_2
		Cit16_3>Cit12_0
		Cit16_3>Cit12_1
		Cit16_3>Cit12_2
		Cit16_4>Cit12_0
		Cit16_4>Cit12_1
		Cit16_4>Cit12_2
		Cit16_5>Cit12_1
		Cit16_5>Cit12_2
		Cit16_6>Cit12_2
Dihydroxyacetone phosphate	DHAP13	DHAP13_0>DHAP13_0
		DHAP13_1>DHAP13_1
		DHAP13_2>DHAP13_2
		DHAP13_3>DHAP13_3
Fructose-6-phosphate	F6P16	F6P16_0>F6P16_0
		F6P16_1>F6P16_1
		F6P16_2>F6P16_2
		F6P16_3>F6P16_3
		F6P16_4>F6P16_4
		F6P16_5>F6P16_5
		F6P16_6>F6P16_6
Fructose-6-phosphate	F6P46	F6P16_0>F6P46_0
		F6P16_1>F6P46_0
		F6P16_1>F6P46_1
		F6P16_2>F6P46_0
		F6P16_2>F6P46_1
		F6P16_2>F6P46_2
		F6P16_3>F6P46_0
		F6P16_3>F6P46_1
		F6P16_3>F6P46_2
		F6P16_3>F6P46_3
		F6P16_4>F6P46_1
		F6P16_4>F6P46_2
		F6P16_4>F6P46_3
		F6P16_5>F6P46_2
		F6P16_5>F6P46_3
		F6P16_6>F6P46_3
Fructose-6-phosphate	F6P56	F6P16_0>F6P56_0
		F6P16_1>F6P56_0
		F6P16_1>F6P56_1
		F6P16_2>F6P56_0
		F6P16_2>F6P56_1
		F6P16_2>F6P56_2
		F6P16_3>F6P56_0
		F6P16_3>F6P56_1
		F6P16_3>F6P56_2
		F6P16_4>F6P56_0
		F6P16_4>F6P56_1
		F6P16_4>F6P56_2
		F6P16_5>F6P56_1
		F6P16_5>F6P56_2
		F6P16_6>F6P56_2
Fructose-1,6-bisphosphate	FBP16	FBP16_0>FBP16_0
		FBP16_1>FBP16_1
		FBP16_2>FBP16_2
		FBP16_3>FBP16_3
		FBP16_4>FBP16_4
		FBP16_5>FBP16_5
		FBP16_6>FBP16_6
Glucose-6-phosphate	G6P16	G6P16_0>G6P16_0
		G6P16_1>G6P16_1
		G6P16_2>G6P16_2
		G6P16_3>G6P16_3
		G6P16_4>G6P16_4
		G6P16_5>G6P16_5
		G6P16_6>G6P16_6
Glucose-6-phosphate	G6P36	G6P16_0>G6P36_0
		G6P16_1>G6P36_0
		G6P16_1>G6P36_1
		G6P16_2>G6P36_0
		G6P16_2>G6P36_1
		G6P16_2>G6P36_2
		G6P16_3>G6P36_1
		G6P16_3>G6P36_2
		G6P16_3>G6P36_3
		G6P16_4>G6P36_2
		G6P16_4>G6P36_3
		G6P16_4>G6P36_4
		G6P16_5>G6P36_3
		G6P16_5>G6P36_4
		G6P16_6>G6P36_4
Glucose-6-phosphate	G6P46	G6P16_0>G6P46_0
		G6P16_1>G6P46_0
		G6P16_1>G6P46_1
		G6P16_2>G6P46_0
		G6P16_2>G6P46_1
		G6P16_2>G6P46_2
		G6P16_3>G6P46_0
		G6P16_3>G6P46_1
		G6P16_3>G6P46_2
		G6P16_3>G6P46_3
		G6P16_4>G6P46_1
		G6P16_4>G6P46_2
		G6P16_4>G6P46_3
		G6P16_5>G6P46_2
		G6P16_5>G6P46_3
		G6P16_6>G6P46_3
Glucose-6-phosphate	G6P56	G6P16_0>G6P56_0
		G6P16_1>G6P56_0
		G6P16_1>G6P56_1
		G6P16_2>G6P56_0
		G6P16_2>G6P56_1
		G6P16_2>G6P56_2
		G6P16_3>G6P56_0
		G6P16_3>G6P56_1
		G6P16_3>G6P56_2
		G6P16_4>G6P56_0
		G6P16_4>G6P56_1
		G6P§16_4>G6P56_2
		G6P16_5>G6P56_1
		G6P16_5>G6P56_2
		G6P16_6>G6P56_2
Malate	Mal14	Mal14_0>Mal14_0
		Mal14_1>Mal14_1
		Mal14_2>Mal14_2
		Mal14_3>Mal14_3
		Mal14_4>Mal14_4
Glycerate-3-phosphate	PGA13	PGA13_0>PGA13_0
		PGA13_1>PGA13_1
		PGA13_2>PGA13_2
		PGA13_3>PGA13_3
Succinate	Suc14	Suc14_0>Suc14_0
		Suc14_1>Suc14_1
		Suc14_2>Suc14_2
		Suc14_3>Suc14_3
		Suc14_4>Suc14_4
Succinate	Suc13	Suc14_0>Suc13_0
		Suc14_1>Suc13_0
		Suc14_1>Suc13_1
		Suc14_2>Suc13_1
		Suc14_2>Suc13_2
		Suc14_3>Suc13_2
		Suc14_3>Suc13_3
		Suc14_4>Suc13_3
Succinate	Suc24	Suc14_0>Suc24_0
		Suc14_1>Suc24_0
		Suc14_1>Suc24_1
		Suc14_2>Suc24_1
		Suc14_2>Suc24_2
		Suc14_3>Suc24_2
		Suc14_3>Suc24_3
		Suc14_4>Suc24_3
